# Supplementary material
Source: Springer Nature journal article supplement (https://www.springermedizin.de/resource/supplementary/12967_2011_960_MOESM1_ESM.pdf/9577266)

# BORIS

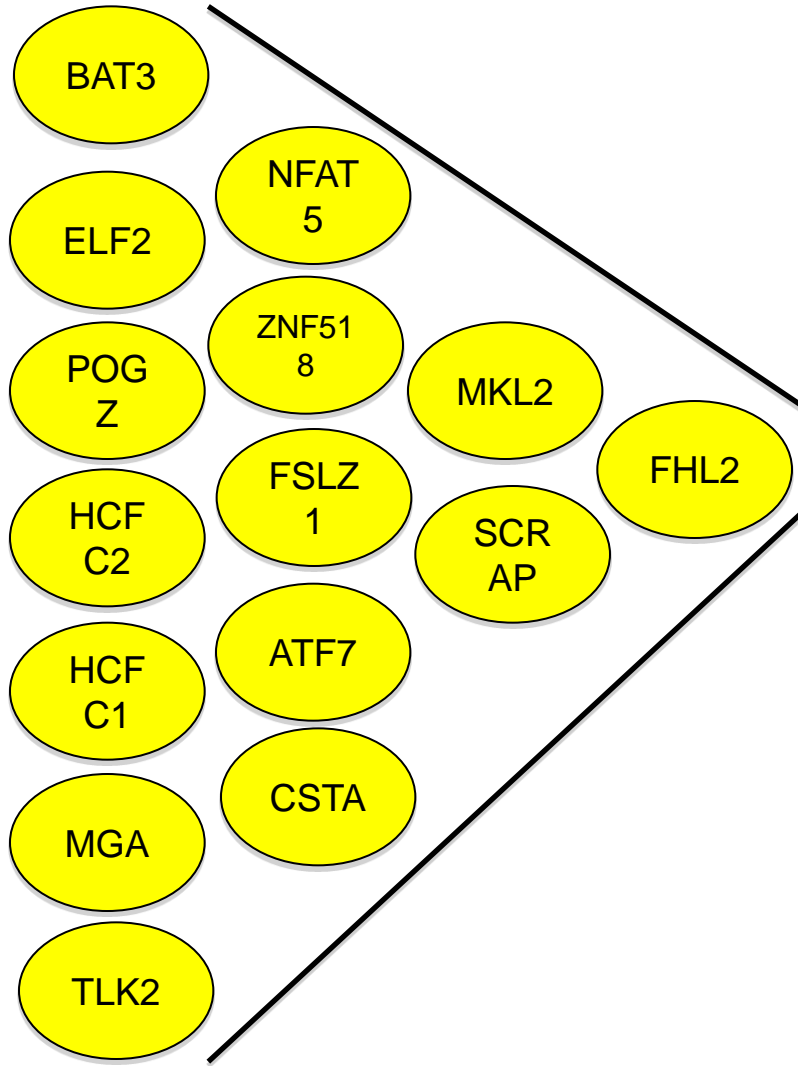

# CHD8

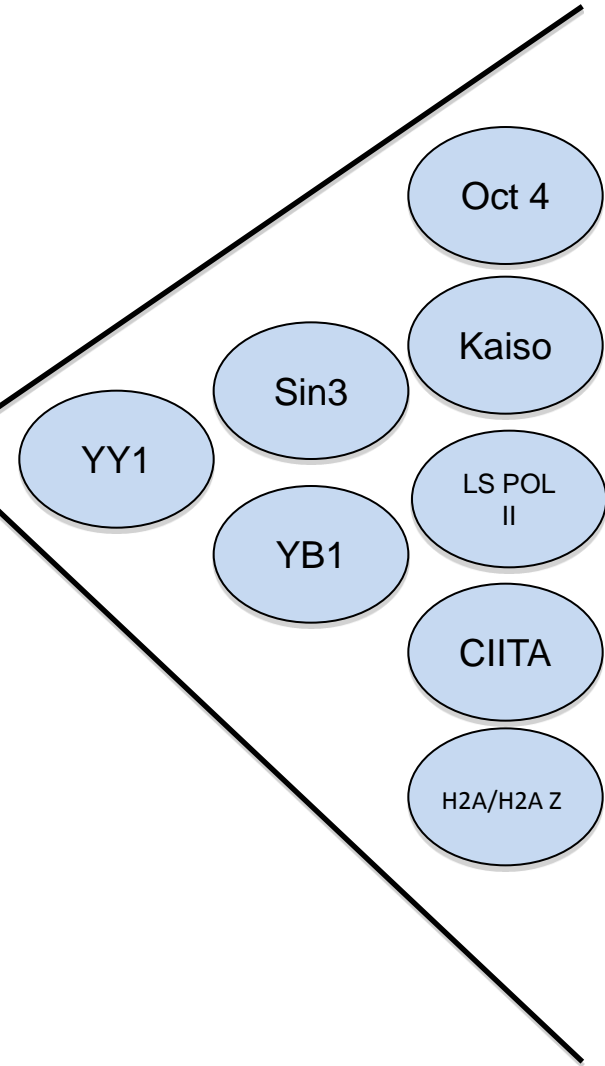

# CTCF

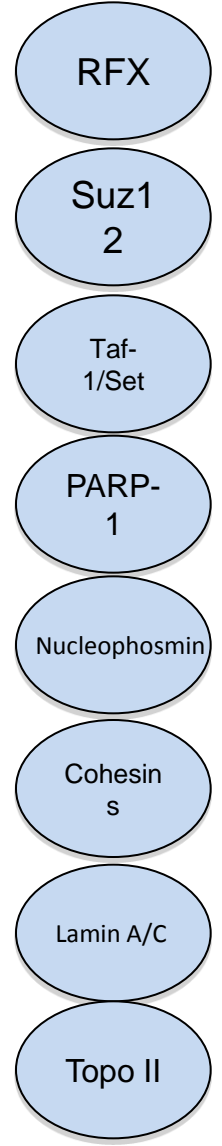

Supplement: MOESM1 [file 9577266]
